# Supplementary material for: Analysis and understanding of amido black 10B dye degradation in aqueous solution by electrocoagulation with the conventional oxidants peroxomonosulfate, peroxodisulfate and hydrogen peroxide
Source: Royal Society of Chemistry journal article supplement (doi:10.1039/c4ew00030g), 2014-11-11
Supplement: c4ew00030g1.pdf [file c4ew00030g1.pdf]

**Table S1:** Summary of different type of wastewater treatment by hydrogen peroxide assisted electrocoagulation processes

| Type of wastewater                                                | Anode-Cathode      | Current density or current | Time            | pH         | [H <sub>2</sub> O <sub>2</sub> ] | Treatment efficiency                     |
|-------------------------------------------------------------------|--------------------|----------------------------|-----------------|------------|----------------------------------|------------------------------------------|
| Olive mill <sup>[22]</sup>                                        | Fe-Fe<br>Al-Al     | 20-75 mA cm <sup>-2</sup>  | 1-3 h           | 6.5<br>5.5 | 2.3%                             | COD = 62-86 %<br>Fe electrodes is better |
| Nonylphenol polyethoxylate and Textile wastewater <sup>[20]</sup> | Fe-Fe<br>Al-Al     | 1.5 A                      | 5 min<br>15 min | 8          | 40 mgL <sup>-1</sup>             | Degradation = 95 %                       |
| Chemical-Mechanical Planarization wastewater <sup>[33]</sup>      | Fe-Fe              | 1A                         | 10 min          | 9          | 120 mgL <sup>-1</sup>            | Turbidity = 100%                         |
| Food wastewater <sup>[21]</sup>                                   | Al-Al              | 18.2 mA cm <sup>-2</sup>   | 60 min          | 4          | 9.79 mM                          | COD removal = 96%<br>BOD removal = 95%   |
| Synthetic dye wastewater <sup>[18]</sup>                          | Fe-Stainless steel | 25 mA cm <sup>-2</sup>     | 8 min           | 6          | 3                                | Color removal = 98%                      |
| Synthetic wastewater (SDS) <sup>[17]</sup>                        | Fe-Fe              | 0.5 mA cm <sup>-2</sup>    | 10 min          | 5          | 50 mg L <sup>-1</sup>            | SDS removal = 81.6%                      |
| Metal plating effluent <sup>[19]</sup>                            | Fe-Fe              | 22 mA cm <sup>-2</sup>     |                 | 2.6        | 20 mM                            | TOC removal =70%                         |
| Pharmaceutical wastewater <sup>[35]</sup>                         | Fe-Fe              | 1.7–1.9 mAcm <sup>-2</sup> | 30 min          | 3          | 300 mgL <sup>-1</sup>            | COD removal =57.7%                       |
| Liquid organic fertilizer wastewater <sup>[34]</sup>              | Fe-Fe              | 50 mA cm <sup>-2</sup>     | 45 min          | 3          | 25 mM                            | TOC removal = 87%<br>COD removal =91%    |

**Table S2:** Characteristics of the dye molecules used in this study

| Details of dye molecule              |                                                                                                | Molecular structure                                                                |
|--------------------------------------|------------------------------------------------------------------------------------------------|------------------------------------------------------------------------------------|
| <i>Molecular Formula</i>             | : C <sub>22</sub> H <sub>14</sub> N <sub>6</sub> Na <sub>2</sub> O <sub>9</sub> S <sub>2</sub> | 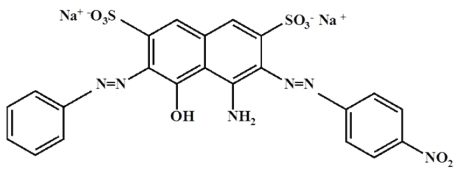 |
| <i>Molecular Weight (g/mol)</i>      | : 615.5                                                                                        |                                                                                    |
| <i>Type</i>                          | : Diazo dye                                                                                    |                                                                                    |
| <i>λ<sub>max</sub> (nm)</i>          | : 617-620                                                                                      |                                                                                    |
| <i>Solubility in water(20°C) g/L</i> | : 30                                                                                           |                                                                                    |

### 3.2 Influence of sodium chloride (NaCl) concentration

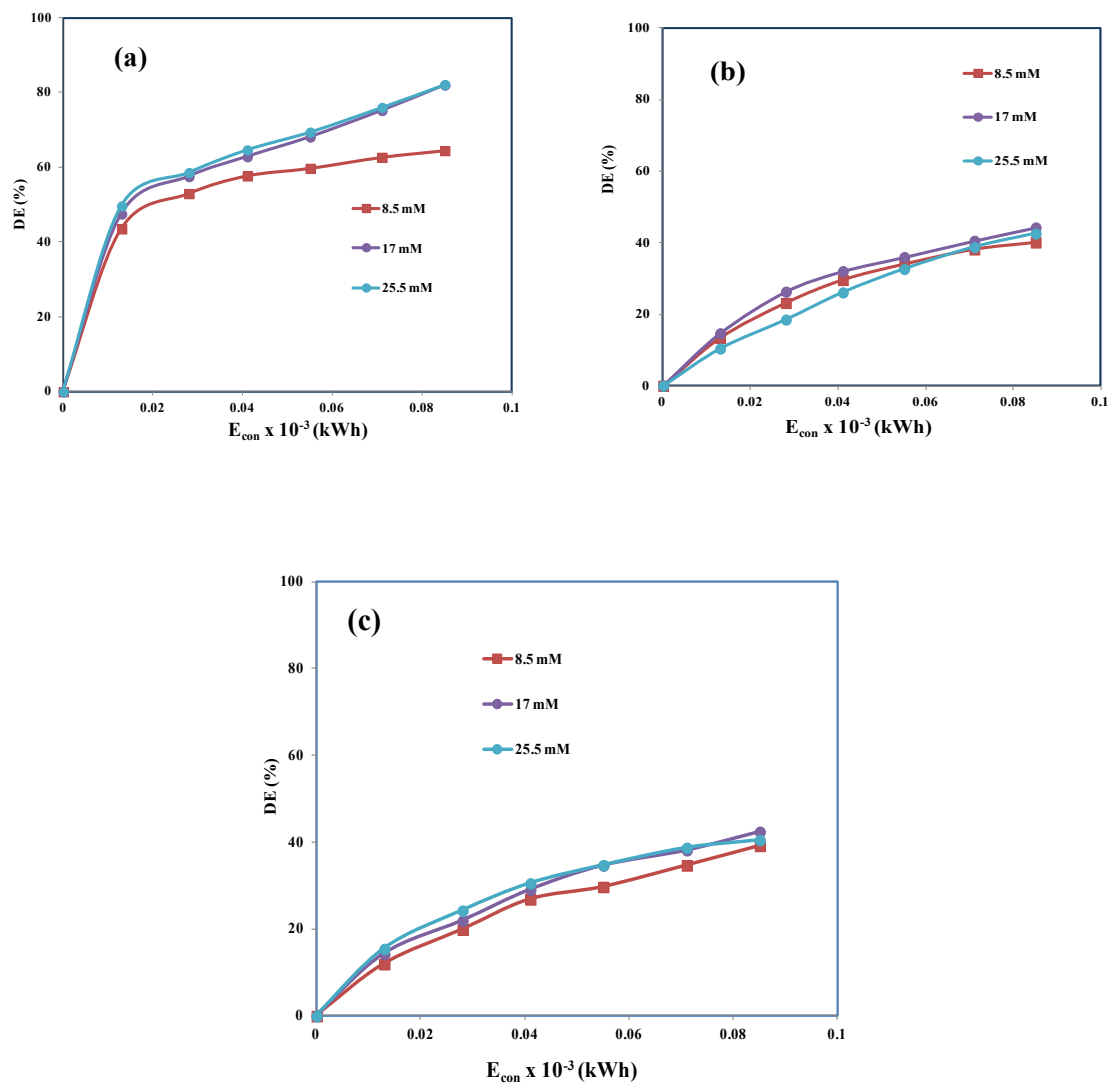

**Fig. S3** - Degradation efficiency as a function of  $E_{con}$  at by EC in the presence of (a) PMS, (b) HP and (c) PDS at different NaCl concentration. ( $C_{AB} = 0.16$  mM,  $C_{oxidant} = 0.07$  mM,  $pH = 7 \pm 0.2$  and Current = 50 mA).

#### S4: Electrical energy consumption

The calculated  $E_{\text{con}}$  values along with obtained degradation efficiency are plotted against electrolysis time in Figure S3. Oxidant assisted EC processes exhibit good degradation efficiency with less energy consumption. The more than 99% degradation efficiencies are achieved from EC assisted with PMS, HP and PDS at energy consumption of 1.7, 4.1 and 3.3 Wh (g dye)<sup>-1</sup> respectively.

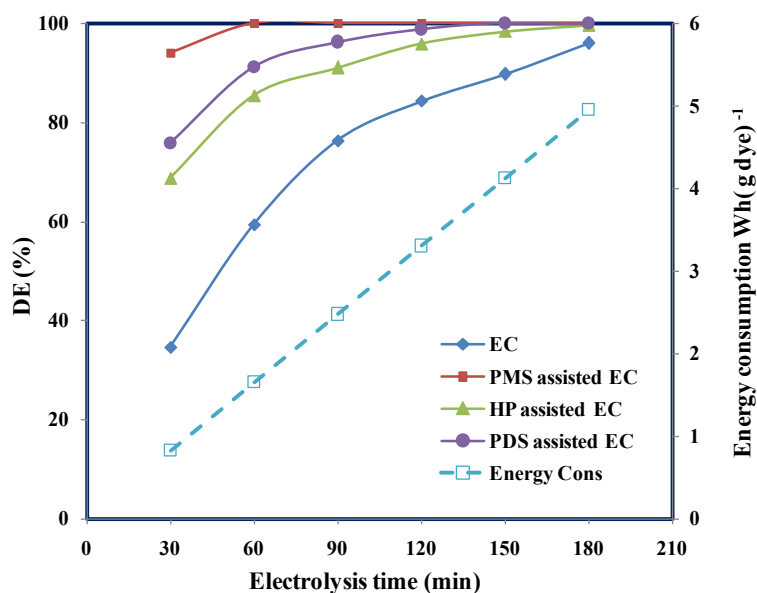

**Fig. S4.** Degradation efficiencies as a function of energy consumption by EC and oxidant assisted EC. ( $C_{\text{AB}} = 0.16$  mM,  $C_{\text{NaCl}} = 17$  mM,  $C_{\text{PMS}} = C_{\text{PDS}} = 0.17$  mM,  $C_{\text{HP}} = 0.13$  mM, current = 50 mA and initial pH = 5).
